# Supplementary material
Source: Springer Nature journal article supplement (https://www.springermedizin.de/resource/supplementary/12885_2010_2522_MOESM2_ESM.pdf/9461946)
Supplement: MOESM2 [file 9461946]

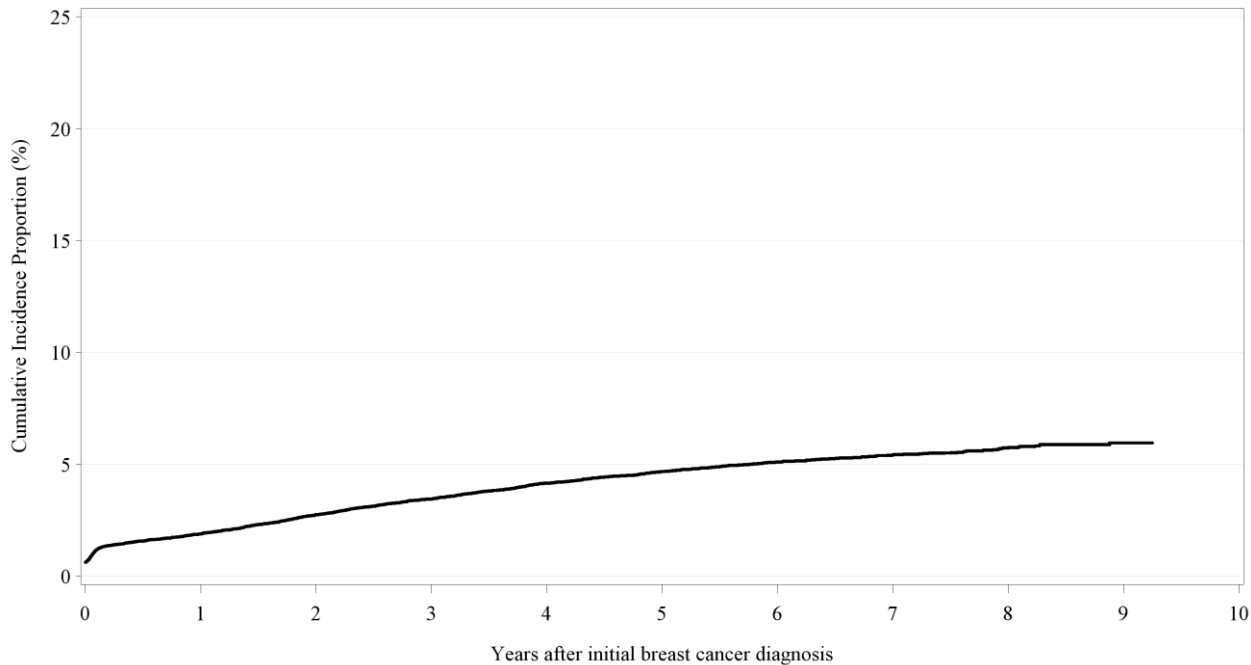

| <b>1-year incidence of bone metastasis<br/>(95% CI)</b> | <b>3-year incidence of bone metastasis<br/>(95% CI)</b> | <b>5-year incidence of bone metastasis<br/>(95% CI)</b> |
|---------------------------------------------------------|---------------------------------------------------------|---------------------------------------------------------|
| 1.9 %<br>(1.7 % - 2.0 %)                                | 3.4 %<br>(3.2 % - 3.6 %)                                | 4.7 %<br>(4.4 % - 4.9 %)                                |
